# Supplementary material
Source: Elsevier journal article supplement (https://univ-rennes.hal.science/hal-01468025v1/file/mmc5.pdf)
Supplement: mmc5 [file mmc5.pdf]

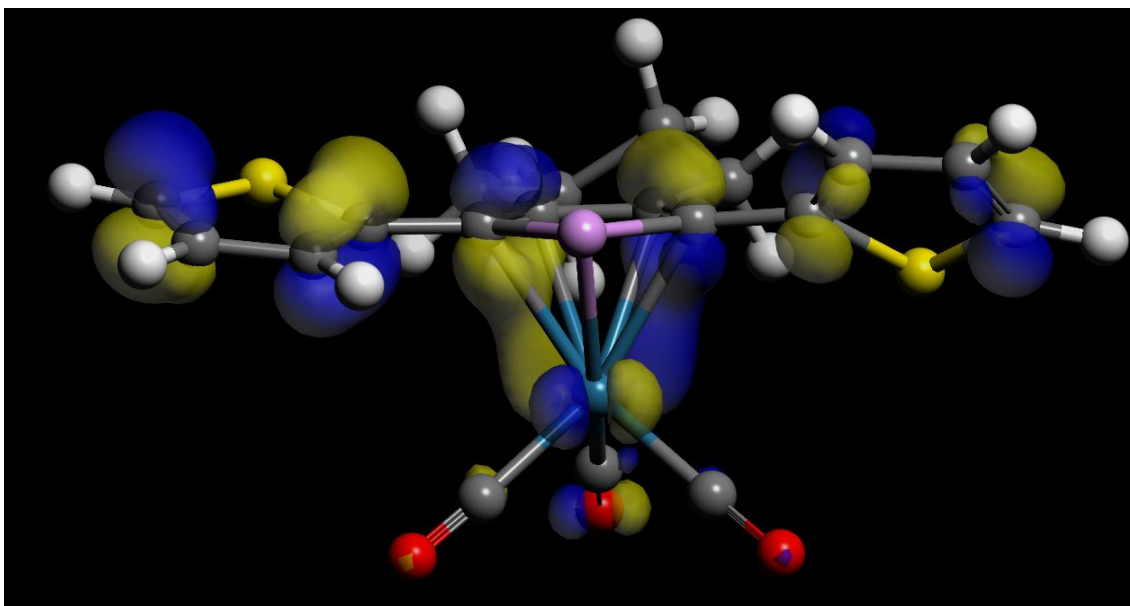

HOMO frontier molecular orbital of the compound **1** depicts the overlapping between the phospholide diene system orbitals and the valence orbital of the metal center.
